# Supplementary material for: Shrub Diversity and Niche Characteristics in the Initial Stage of Reconstruction of Low-Efficiency Cupressus funebris Stands
Source: MDPI journal article supplement (doi:10.3390/f12111492), 2021-10-29
Supplement: s1 [file s1]

**Table S1.** Shrubs and their basic growth characteristics.

| Species                        | Description                                                                                     |
|--------------------------------|-------------------------------------------------------------------------------------------------|
| <i>Alangium chinense</i>       | Deciduous tree or shrub, 3–5 m tall, found in montane or sparse forests                         |
| <i>Cupressus funebris</i>      | Coniferous species, fast growing and adaptable, can be used as afforestation species            |
| <i>Rubus coreanus</i>          | Shrub, 1–3 m tall, in thickets on mountain slopes or in valleys, riversides, roadsides          |
| <i>Broussonetia papyrifera</i> | Tree, strong, masculine species, extraordinarily adaptable and resistant to adversity           |
| <i>Toona ciliata</i>           | A masculine, deep-rooted species that likes warmth and is shade intolerant                      |
| <i>Elaeagnus pungens</i>       | Evergreen erect shrub, not afraid of sun exposure, also has strong shade tolerance              |
| <i>Zanthoxylum bungeanum</i>   | Small deciduous tree, 3–7 m tall, spines on stem often fall early, drought tolerant, sun-loving |
| <i>Vitex negundo</i>           | Shrub or small tree with strong sprouting ability and adaptability                              |
| <i>Pyracantha fortuneana</i>   | Evergreen shrub or small tree, likes strong light, tolerant of barrenness                       |
| <i>Coriaria nepalensis</i>     | Shrub, very adaptable, tolerant of drought and infertile conditions                             |
| <i>Ligustrum lucidum</i>       | Evergreen tree or shrub, water and moisture tolerant, light and shade tolerant                  |
| <i>Rhamnus davurica</i>        | Adaptable, hardy, drought tolerant, infertile, born in shady and wet places                     |
| <i>Myrsine africana</i>        | Shrubby plant, grows in sparse forests or forest margins on barren slopes, shade tolerant       |
| <i>Sapium sebiferum</i>        | Tree, light-loving species, with certain requirements for light and temperature                 |
| <i>Rhus chinensis</i>          | Small tree or shrub, light-loving, well-developed root system, fast growth                      |
| <i>Vernicia fordii</i>         | Deciduous tree, likes warm and humid climates                                                   |

**Table S2.** The niche overlap of shrub populations under different reconstruction patterns.

|                                |                       | Niche Overlap            |                                |                          |                              |                      |                         |                       |                        |                            |                         |                         |                           |                          |                      |  |
|--------------------------------|-----------------------|--------------------------|--------------------------------|--------------------------|------------------------------|----------------------|-------------------------|-----------------------|------------------------|----------------------------|-------------------------|-------------------------|---------------------------|--------------------------|----------------------|--|
| Species                        | <i>Rubus coreanus</i> | <i>Alangium chinense</i> | <i>Broussonetia papyrifera</i> | <i>Elaeagnus pungens</i> | <i>Zanthoxylum bungeanum</i> | <i>Vitex negundo</i> | <i>Myrsine africana</i> | <i>Rhus chinensis</i> | <i>Vernicia fordii</i> | <i>Coriaria nepalensis</i> | <i>Sapium sebiferum</i> | <i>Rhamnus davurica</i> | <i>Cupressus funebris</i> | <i>Ligustrum lucidum</i> | <i>Toona ciliata</i> |  |
| <i>Pyracantha fortuneana</i>   | 0.702                 | 0.456                    | 0.612                          | 0.402                    | 0.441                        | 0.528                | 0.339                   | 0.573                 | 0.558                  | 0.770                      | 0.548                   | 0.519                   | 0.513                     | 0.382                    | 0.652                |  |
| <i>Rubus coreanus</i>          |                       | 0.186                    | 0.461                          | 0.538                    | 0.288                        | 0.449                | 0.359                   | 0.489                 | 0.438                  | 0.820                      | 0.651                   | 0.895                   | 0.645                     | 0.700                    | 0.925                |  |
| <i>Alangium chinense</i>       |                       |                          | 0.608                          | 0.288                    | 0.606                        | 0.740                | 0.799                   | 0.530                 | 0.456                  | 0.176                      | 0.134                   | 0.128                   | 0.573                     | 0.167                    | 0.058                |  |
| <i>Broussonetia papyrifera</i> |                       |                          |                                | 0.593                    | 0.780                        | 0.692                | 0.501                   | 0.918                 | 0.667                  | 0.447                      | 0.607                   | 0.470                   | 0.402                     | 0.561                    | 0.249                |  |
| <i>Elaeagnus pungens</i>       |                       |                          |                                |                          | 0.588                        | 0.323                | 0.540                   | 0.580                 | 0.687                  | 0.421                      | 0.493                   | 0.625                   | 0.438                     | 0.693                    | 0.409                |  |
| <i>Zanthoxylum bungeanum</i>   |                       |                          |                                |                          |                              | 0.565                | 0.478                   | 0.771                 | 0.311                  | 0.474                      | 0.477                   | 0.242                   | 0.371                     | 0.292                    | 0.186                |  |
| <i>Vitex negundo</i>           |                       |                          |                                |                          |                              |                      | 0.592                   | 0.641                 | 0.336                  | 0.385                      | 0.509                   | 0.318                   | 0.660                     | 0.361                    | 0.301                |  |
| <i>Myrsine africana</i>        |                       |                          |                                |                          |                              |                      |                         | 0.469                 | 0.547                  | 0.259                      | 0.183                   | 0.443                   | 0.758                     | 0.437                    | 0.287                |  |
| <i>Rhus chinensis</i>          |                       |                          |                                |                          |                              |                      |                         |                       | 0.541                  | 0.516                      | 0.442                   | 0.528                   | 0.297                     | 0.535                    | 0.329                |  |
| <i>Vernicia fordii</i>         |                       |                          |                                |                          |                              |                      |                         |                       |                        | 0.166                      | 0.370                   | 0.558                   | 0.340                     | 0.647                    | 0.257                |  |
| <i>Coriaria nepalensis</i>     |                       |                          |                                |                          |                              |                      |                         |                       |                        |                            | 0.564                   | 0.628                   | 0.553                     | 0.397                    | 0.844                |  |

|                           |       |       |       |           |
|---------------------------|-------|-------|-------|-----------|
| <i>Sapium sebiferum</i>   | 0.585 | 0.602 | 0.622 | 0.51<br>3 |
| <i>Rhamnus davurica</i>   | 0.597 | 0.896 |       | 0.76<br>2 |
| <i>Cupressus funebris</i> |       | 0.554 |       | 0.56<br>2 |
| <i>Ligustrum lucidum</i>  |       |       |       | 0.44<br>5 |
| <i>Toona ciliata</i>      |       |       |       |           |

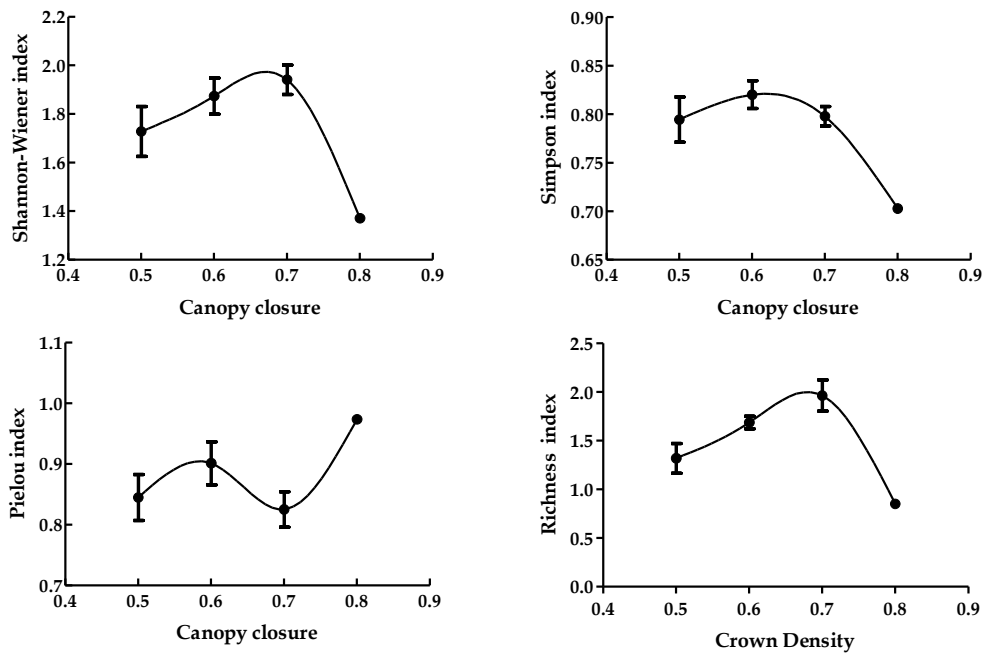

**Figure S1.** Diversity index at different canopy closures after forest reconstruction (all patterns).
